# Supplementary material
Source: publisher figshare collection journal article supplement (https://acs.figshare.com/ndownloader/files/4775110)
Supplement: Supplementary file 1 [file 4775110]

data_288
 
_audit_creation_method            SHELXL-97
_chemical_name_systematic
;
 ?
;
_chemical_name_common             ?
_chemical_melting_point           ?
_chemical_absolute_configuration   syn
_chemical_formula_moiety          ?
_chemical_formula_sum
 'C16 H23 O10'
_chemical_formula_weight          375.34
 
loop_
 _atom_type_symbol
 _atom_type_description
 _atom_type_scat_dispersion_real
 _atom_type_scat_dispersion_imag
 _atom_type_scat_source
 'C'  'C'   0.0181   0.0091
 'International Tables Vol C Tables 4.2.6.8 and 6.1.1.4'
 'H'  'H'   0.0000   0.0000
 'International Tables Vol C Tables 4.2.6.8 and 6.1.1.4'
 'O'  'O'   0.0492   0.0322
 'International Tables Vol C Tables 4.2.6.8 and 6.1.1.4'
 
_symmetry_cell_setting            Monoclinic
_symmetry_space_group_name_H-M    P2(1)
 
loop_
 _symmetry_equiv_pos_as_xyz
 'x, y, z'
 '-x, y+1/2, -z'
 
_cell_length_a                    11.579(2)
_cell_length_b                    7.2480(14)
_cell_length_c                    11.656(2)
_cell_angle_alpha                 90.00
_cell_angle_beta                  103.70(3)
_cell_angle_gamma                 90.00
_cell_volume                      950.4(3)
_cell_formula_units_Z             2
_cell_measurement_temperature     295(2)
_cell_measurement_reflns_used     16
_cell_measurement_theta_min       20
_cell_measurement_theta_max       25
 
_exptl_crystal_description        ?
_exptl_crystal_colour             ?
_exptl_crystal_size_max           0.16
_exptl_crystal_size_mid           0.07
_exptl_crystal_size_min           0.07
_exptl_crystal_density_meas       ?
_exptl_crystal_density_diffrn     1.312
_exptl_crystal_density_method     'not measured'
_exptl_crystal_F_000              398
_exptl_absorpt_coefficient_mu     0.946
_exptl_absorpt_correction_type    numerical
_exptl_absorpt_correction_T_min   0.8634
_exptl_absorpt_correction_T_max   0.9368
_exptl_absorpt_process_details    SHELXPREP
 
_exptl_special_details
;
 ?
;
 
_diffrn_ambient_temperature       295(2)
_diffrn_radiation_wavelength      1.54178
_diffrn_radiation_type            CuK\a
_diffrn_radiation_source          'fine-focus sealed tube'
_diffrn_radiation_monochromator   graphite
_diffrn_measurement_device_type   ?
_diffrn_measurement_method        ' \w scans'
_diffrn_detector_area_resol_mean  ?
_diffrn_standards_number          1
_diffrn_standards_interval_count  120
_diffrn_standards_interval_time   ?
_diffrn_standards_decay_%         0
_diffrn_reflns_number             1907
_diffrn_reflns_av_R_equivalents   0.0863
_diffrn_reflns_av_sigmaI/netI     0.0569
_diffrn_reflns_limit_h_min        -13
_diffrn_reflns_limit_h_max        13
_diffrn_reflns_limit_k_min        0
_diffrn_reflns_limit_k_max        8
_diffrn_reflns_limit_l_min        0
_diffrn_reflns_limit_l_max        13
_diffrn_reflns_theta_min          3.90
_diffrn_reflns_theta_max          66.53
_reflns_number_total              1815
_reflns_number_gt                 1329
_reflns_threshold_expression      >2sigma(I)
 
_computing_data_collection        'ENRAF NONIUS CAD4'
_computing_cell_refinement        CAD4
_computing_data_reduction         CAD4
_computing_structure_solution     'SHELXS-97 (Sheldrick, 1990)'
_computing_structure_refinement   'SHELXL-97 (Sheldrick, 1997)'
_computing_molecular_graphics     SHELXLTL-Plus
_computing_publication_material   SHELXL-93
 
_refine_special_details
;
 Refinement of F^2^ against ALL reflections.  The weighted R-factor wR and
 goodness of fit S are based on F^2^, conventional R-factors R are based
 on F, with F set to zero for negative F^2^. The threshold expression of
 F^2^ > 2sigma(F^2^) is used only for calculating R-factors(gt) etc. and is
 not relevant to the choice of reflections for refinement.  R-factors based
 on F^2^ are statistically about twice as large as those based on F, and R-
 factors based on ALL data will be even larger.
;
 
_refine_ls_structure_factor_coef  Fsqd
_refine_ls_matrix_type            full
_refine_ls_weighting_scheme       calc
_refine_ls_weighting_details
 'calc w=1/[\s^2^(Fo^2^)+(0.2000P)^2^+0.0000P] where P=(Fo^2^+2Fc^2^)/3'
_atom_sites_solution_primary      direct
_atom_sites_solution_secondary    difmap
_atom_sites_solution_hydrogens    geom
_refine_ls_hydrogen_treatment     constr
_refine_ls_extinction_method      none
_refine_ls_extinction_coef        ?
_refine_ls_abs_structure_details
 'Flack H D (1983), Acta Cryst. A39, 876-881'
_refine_ls_abs_structure_Flack    -0.2(8)
_refine_ls_number_reflns          1815
_refine_ls_number_parameters      239
_refine_ls_number_restraints      1
_refine_ls_R_factor_all           0.1465
_refine_ls_R_factor_gt            0.1087
_refine_ls_wR_factor_ref          0.3243
_refine_ls_wR_factor_gt           0.2648
_refine_ls_goodness_of_fit_ref    1.336
_refine_ls_restrained_S_all       1.336
_refine_ls_shift/su_max           0.039
_refine_ls_shift/su_mean          0.002
 
loop_
 _atom_site_label
 _atom_site_type_symbol
 _atom_site_fract_x
 _atom_site_fract_y
 _atom_site_fract_z
 _atom_site_U_iso_or_equiv
 _atom_site_adp_type
 _atom_site_occupancy
 _atom_site_symmetry_multiplicity
 _atom_site_calc_flag
 _atom_site_refinement_flags
 _atom_site_disorder_assembly
 _atom_site_disorder_group
O1 O 1.5909(5) 1.4914(9) 1.7207(5) 0.0562(15) Uani 1 1 d . . .
O2 O 1.6732(4) 1.2897(9) 1.9411(5) 0.0543(15) Uani 1 1 d . . .
O3 O 1.7794(5) 0.9556(9) 1.9079(5) 0.0545(15) Uani 1 1 d . . .
O4 O 1.9526(4) 1.0005(9) 1.7585(5) 0.0538(14) Uani 1 1 d . . .
O5 O 1.7178(4) 1.3282(9) 1.6401(4) 0.0535(14) Uani 1 1 d . . .
O6 O 1.7675(6) 1.0530(15) 1.4825(6) 0.086(3) Uani 1 1 d . . .
O9 O 1.4778(6) 1.2256(19) 1.8846(7) 0.098(3) Uani 1 1 d . . .
O11 O 1.9596(5) 0.9584(12) 2.0308(6) 0.076(2) Uani 1 1 d . . .
O13 O 1.8883(7) 0.7153(12) 1.7004(9) 0.098(3) Uani 1 1 d . . .
O15 O 1.9060(11) 0.9005(17) 1.4231(14) 0.155(5) Uani 1 1 d . . .
C1 C 1.6987(6) 1.3961(13) 1.7473(7) 0.0493(19) Uani 1 1 d . . .
H1A H 1.7639 1.4772 1.7865 0.059 Uiso 1 1 calc R . .
C2 C 1.6872(6) 1.2313(13) 1.8255(6) 0.0466(17) Uani 1 1 d . . .
H2A H 1.6203 1.1532 1.7866 0.056 Uiso 1 1 calc R . .
C3 C 1.8021(6) 1.1225(11) 1.8487(7) 0.0456(17) Uani 1 1 d . . .
H3A H 1.8669 1.1931 1.8990 0.055 Uiso 1 1 calc R . .
C4 C 1.8330(7) 1.0713(13) 1.7334(7) 0.0493(19) Uani 1 1 d . . .
H4A H 1.7772 0.9784 1.6913 0.059 Uiso 1 1 calc R . .
C5 C 1.8313(7) 1.2410(14) 1.6562(7) 0.053(2) Uani 1 1 d . . .
H5A H 1.8935 1.3269 1.6956 0.064 Uiso 1 1 calc R . .
C6 C 1.8505(10) 1.192(2) 1.5337(9) 0.082(3) Uani 1 1 d . . .
H6A H 1.8389 1.3010 1.4838 0.098 Uiso 1 1 calc R . .
H6B H 1.9309 1.1480 1.5410 0.098 Uiso 1 1 calc R . .
C7 C 1.5967(9) 1.6627(15) 1.6669(9) 0.071(3) Uani 1 1 d . . .
H7A H 1.6714 1.7114 1.6685 0.085 Uiso 1 1 calc R . .
C8 C 1.5062(9) 1.7552(18) 1.6163(9) 0.081(3) Uani 1 1 d . . .
H8A H 1.4304 1.7100 1.6133 0.097 Uiso 1 1 calc R . .
H8B H 1.5155 1.8685 1.5820 0.097 Uiso 1 1 calc R . .
C9 C 1.5641(7) 1.2643(16) 1.9647(8) 0.063(2) Uani 1 1 d . . .
C10 C 1.5702(11) 1.285(3) 2.0933(10) 0.093(4) Uani 1 1 d . . .
H10A H 1.4918 1.2744 2.1068 0.140 Uiso 1 1 calc R . .
H10B H 1.6025 1.4042 2.1195 0.140 Uiso 1 1 calc R . .
H10C H 1.6203 1.1907 2.1365 0.140 Uiso 1 1 calc R . .
C11 C 1.8639(7) 0.8918(14) 1.9993(7) 0.054(2) Uani 1 1 d . . .
C12 C 1.8214(9) 0.730(2) 2.0564(10) 0.079(3) Uani 1 1 d . . .
H12A H 1.8878 0.6705 2.1079 0.119 Uiso 1 1 calc R . .
H12B H 1.7822 0.6449 1.9968 0.119 Uiso 1 1 calc R . .
H12C H 1.7665 0.7709 2.1013 0.119 Uiso 1 1 calc R . .
C13 C 1.9701(8) 0.8176(14) 1.7396(8) 0.059(2) Uani 1 1 d . . .
C14 C 2.0989(8) 0.7744(19) 1.7730(10) 0.074(3) Uani 1 1 d . . .
H14A H 2.1097 0.6455 1.7912 0.111 Uiso 1 1 calc R . .
H14B H 2.1365 0.8459 1.8409 0.111 Uiso 1 1 calc R . .
H14C H 2.1340 0.8039 1.7084 0.111 Uiso 1 1 calc R . .
C15 C 1.8028(11) 0.907(2) 1.4281(8) 0.082(3) Uani 1 1 d . . .
C16 C 1.7090(15) 0.772(3) 1.3868(13) 0.123(6) Uani 1 1 d . . .
H16A H 1.7424 0.6502 1.3946 0.185 Uiso 1 1 calc R . .
H16B H 1.6718 0.7956 1.3054 0.185 Uiso 1 1 calc R . .
H16C H 1.6510 0.7816 1.4332 0.185 Uiso 1 1 calc R . .
 
loop_
 _atom_site_aniso_label
 _atom_site_aniso_U_11
 _atom_site_aniso_U_22
 _atom_site_aniso_U_33
 _atom_site_aniso_U_23
 _atom_site_aniso_U_13
 _atom_site_aniso_U_12
O1 0.045(3) 0.047(3) 0.074(4) 0.021(3) 0.010(2) 0.005(3)
O2 0.051(3) 0.056(4) 0.060(3) -0.001(3) 0.020(2) 0.000(3)
O3 0.050(3) 0.051(3) 0.060(3) 0.014(3) 0.009(2) -0.007(3)
O4 0.041(3) 0.051(3) 0.072(3) -0.007(3) 0.017(2) -0.007(3)
O5 0.049(3) 0.059(3) 0.049(3) 0.007(3) 0.006(2) 0.002(3)
O6 0.072(4) 0.123(8) 0.060(4) -0.026(4) 0.012(3) 0.028(5)
O9 0.051(4) 0.153(9) 0.091(5) -0.003(6) 0.018(3) -0.017(5)
O11 0.057(4) 0.071(5) 0.090(5) 0.013(4) -0.001(3) -0.004(4)
O13 0.069(4) 0.055(4) 0.157(8) -0.007(5) 0.003(5) -0.014(4)
O15 0.149(9) 0.090(7) 0.275(15) 0.004(10) 0.147(10) 0.019(8)
C1 0.041(4) 0.049(5) 0.055(4) 0.012(4) 0.004(3) -0.002(4)
C2 0.041(3) 0.045(4) 0.050(4) -0.003(3) 0.005(3) -0.002(3)
C3 0.044(4) 0.042(4) 0.049(4) 0.005(4) 0.006(3) -0.005(3)
C4 0.039(4) 0.051(5) 0.058(4) 0.004(4) 0.011(3) 0.001(3)
C5 0.048(4) 0.058(5) 0.052(4) 0.012(4) 0.011(3) -0.001(4)
C6 0.071(6) 0.101(10) 0.073(6) 0.006(7) 0.020(5) 0.003(7)
C7 0.060(5) 0.058(6) 0.092(7) 0.015(6) 0.015(5) -0.010(5)
C8 0.066(5) 0.073(7) 0.096(7) 0.030(7) 0.006(5) 0.009(6)
C9 0.054(5) 0.069(6) 0.074(5) 0.009(5) 0.029(4) 0.009(4)
C10 0.092(7) 0.108(11) 0.093(7) -0.005(8) 0.050(6) -0.002(8)
C11 0.045(4) 0.057(5) 0.060(4) 0.014(4) 0.011(3) 0.008(4)
C12 0.066(5) 0.080(8) 0.090(7) 0.029(6) 0.016(5) 0.007(6)
C13 0.058(5) 0.047(5) 0.072(5) 0.003(4) 0.018(4) 0.006(4)
C14 0.054(5) 0.081(7) 0.086(6) -0.011(6) 0.016(4) 0.017(5)
C15 0.102(8) 0.092(9) 0.055(5) 0.018(6) 0.022(5) 0.027(8)
C16 0.135(12) 0.119(14) 0.108(10) -0.044(11) 0.013(9) 0.011(12)
 
_geom_special_details
;
 All esds (except the esd in the dihedral angle between two l.s. planes)
 are estimated using the full covariance matrix.  The cell esds are taken
 into account individually in the estimation of esds in distances, angles
 and torsion angles; correlations between esds in cell parameters are only
 used when they are defined by crystal symmetry.  An approximate (isotropic)
 treatment of cell esds is used for estimating esds involving l.s. planes.
;
 
loop_
 _geom_bond_atom_site_label_1
 _geom_bond_atom_site_label_2
 _geom_bond_distance
 _geom_bond_site_symmetry_2
 _geom_bond_publ_flag
O1 C1 1.396(10) . ?
O1 C7 1.400(12) . ?
O2 C9 1.368(10) . ?
O2 C2 1.457(10) . ?
O3 C11 1.347(9) . ?
O3 C3 1.448(10) . ?
O4 C13 1.367(12) . ?
O4 C4 1.441(9) . ?
O5 C1 1.409(11) . ?
O5 C5 1.431(10) . ?
O6 C15 1.348(15) . ?
O6 C6 1.423(17) . ?
O9 C9 1.227(11) . ?
O11 C11 1.184(10) . ?
O13 C13 1.204(12) . ?
O15 C15 1.212(14) . ?
C1 C2 1.528(11) . ?
C2 C3 1.514(11) . ?
C3 C4 1.517(11) . ?
C4 C5 1.521(12) . ?
C5 C6 1.536(14) . ?
C7 C8 1.266(14) . ?
C9 C10 1.492(15) . ?
C11 C12 1.488(15) . ?
C13 C14 1.483(12) . ?
C15 C16 1.45(2) . ?
 
loop_
 _geom_angle_atom_site_label_1
 _geom_angle_atom_site_label_2
 _geom_angle_atom_site_label_3
 _geom_angle
 _geom_angle_site_symmetry_1
 _geom_angle_site_symmetry_3
 _geom_angle_publ_flag
C1 O1 C7 113.8(7) . . ?
C9 O2 C2 117.2(6) . . ?
C11 O3 C3 118.9(6) . . ?
C13 O4 C4 118.9(7) . . ?
C1 O5 C5 111.8(5) . . ?
C15 O6 C6 120.4(9) . . ?
O1 C1 O5 107.2(6) . . ?
O1 C1 C2 108.7(6) . . ?
O5 C1 C2 108.1(7) . . ?
O2 C2 C3 105.8(6) . . ?
O2 C2 C1 111.6(7) . . ?
C3 C2 C1 108.5(6) . . ?
O3 C3 C2 105.6(6) . . ?
O3 C3 C4 109.0(7) . . ?
C2 C3 C4 110.6(6) . . ?
O4 C4 C3 108.9(6) . . ?
O4 C4 C5 106.6(6) . . ?
C3 C4 C5 110.7(7) . . ?
O5 C5 C4 108.5(6) . . ?
O5 C5 C6 108.1(7) . . ?
C4 C5 C6 112.3(9) . . ?
O6 C6 C5 108.7(9) . . ?
C8 C7 O1 123.8(10) . . ?
O9 C9 O2 120.1(8) . . ?
O9 C9 C10 128.6(9) . . ?
O2 C9 C10 111.2(9) . . ?
O11 C11 O3 123.9(9) . . ?
O11 C11 C12 124.5(8) . . ?
O3 C11 C12 111.6(7) . . ?
O13 C13 O4 121.7(8) . . ?
O13 C13 C14 128.4(10) . . ?
O4 C13 C14 109.9(9) . . ?
O15 C15 O6 117.6(14) . . ?
O15 C15 C16 128.9(14) . . ?
O6 C15 C16 113.4(11) . . ?
 
_diffrn_measured_fraction_theta_max    0.997
_diffrn_reflns_theta_full              66.53
_diffrn_measured_fraction_theta_full   0.997
_refine_diff_density_max    0.536
_refine_diff_density_min   -0.581
_refine_diff_density_rms    0.127
